# Supplementary material for: The proteomes of ovarian cancer ascitic cellular aggregates correlate with their ex vivo platinum sensitivities: a pilot study
Source: Research Square preprint supplement (doi:10.21203/rs.3.rs-6441929/v1), 2025-05-09
Supplement: Supplementary file 1 [file 73c753116e020ec9a5113c73.docx]

**
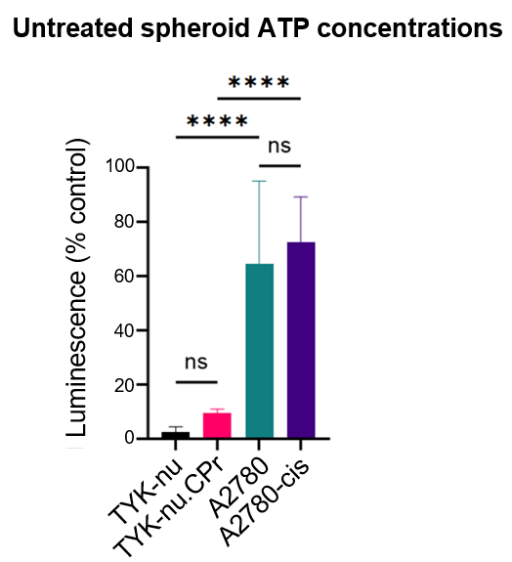
**

**Supplementary Figure S1:** The ATP concentrations of artificial spheroids generated from TYK-nu, TYK-nu.CPr, A2780, and A2780-cis cell lines. Values are mean ± SD; ****p<0.0001.


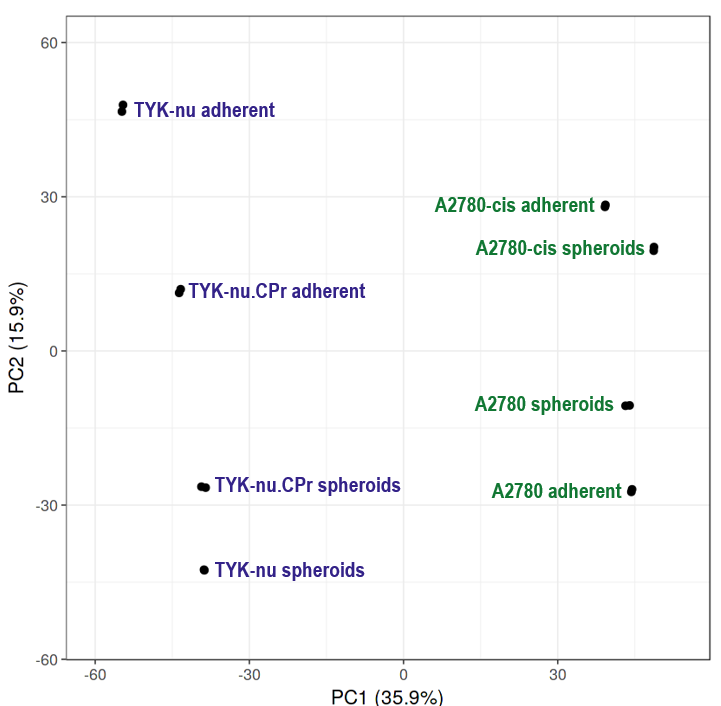


**Supplementary Figure S2: PCA plot of the global proteomes of adherent cells and artificial spheroids generated from the TYK-nu and A2780 parental cell lines and their cisplatin-resistant counterparts.** TheA2780 and A2780-cis (green) cell lines separated from TYK-nu and TYK-nu.CPr (blue) cell lines along the first component (n=2). TYK-nu and TYK-nu.CPr adherent cells and spheroids separated along the second component based on their growth conditions, while A2780 and A2780-cis spheroids separated along the second component according to CBP sensitivity.

**
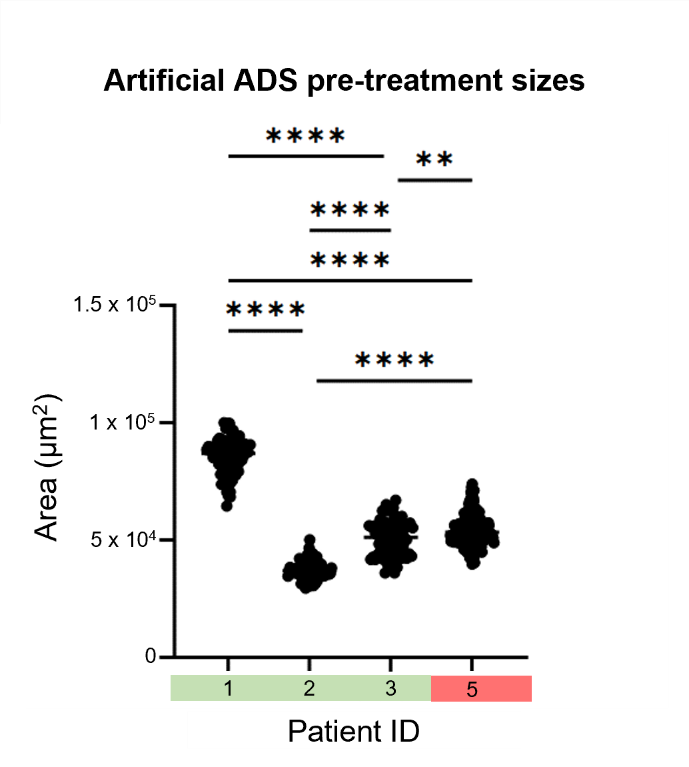
**

**Supplementary Figure S3:** The sizes of artificial ADS from a subset of patients that were imaged 72 hours after seeding. Artificial ADS from patient 4 could not be sized due to the presence of non-spheroidal matter. Green and red shading indicate *ex vivo* sensitivity and resistance to CBP, respectively. **Supplementary Table S1: Differentially abundant proteins between sensitive and resistant native ADS that are listed in the MatrixDB database.** Proteins were considered significant when the q-value was less than 0.05 and the log 2-fold change (FC) was less than -1 or greater than 1. R= resistant native ADS; S= sensitive native ADS.

| **UniProt ID** | **Protein name** | **Log2 FC (R/S)** | **Q-val** |
| --- | --- | --- | --- |
| P13727 | Bone marrow proteoglycan | 7.51 | 2.9E-10 |
| P06731 | Carcinoembryonic antigen-related cell adhesion molecule 5 | 5.10 | 1.4E-03 |
| P02452 | Collagen alpha-1(I) chain | 5.00 | 1.8E-03 |
| P40199 | Carcinoembryonic antigen-related cell adhesion molecule 6 | 4.37 | 1.4E-03 |
| Q14002 | Carcinoembryonic antigen-related cell adhesion molecule 7 | 3.99 | 3.2E-03 |
| Q70J99 | Protein unc-13 homolog D | 3.68 | 2.2E-03 |
| P17936 | Insulin-like growth factor-binding protein 3 | 3.65 | 2.6E-04 |
| P15144 | Aminopeptidase N | 3.61 | 8.5E-08 |
| P36952 | Serpin B5 | 3.59 | 2.4E-04 |
| P08123 | Collagen alpha-2(I) chain | 3.59 | 6.0E-03 |
| P35556 | Fibrillin-2 | 3.57 | 5.3E-03 |
| P12110 | Collagen alpha-2(VI) chain | 3.47 | 7.7E-05 |
| O43653 | Prostate stem cell antigen | 3.40 | 9.0E-04 |
| P13726 | Tissue factor | 3.37 | 1.6E-03 |
| P09668 | Pro-cathepsin H | 3.23 | 1.4E-05 |
| P11678 | Eosinophil peroxidase | 3.10 | 1.8E-05 |
| P00749 | Urokinase-type plasminogen activator | 3.08 | 4.7E-04 |
| P01584 | Interleukin-1 beta | 2.92 | 1.4E-03 |
| P09237 | Matrilysin | 2.87 | 3.4E-05 |
| P18510 | Interleukin-1 receptor antagonist protein | 2.85 | 3.4E-07 |
| Q6ZMP0 | Thrombospondin type-1 domain-containing protein 4 | 2.82 | 3.7E-04 |
| P05120 | Plasminogen activator inhibitor 2 | 2.69 | 9.5E-04 |
| P08572 | Collagen alpha-2(IV) chain | 2.69 | 9.7E-03 |
| O00515 | Ladinin-1 | 2.54 | 7.1E-05 |
| P52790 | Hexokinase-3 | 2.49 | 8.8E-03 |
| Q6UX06 | Olfactomedin-4 | 2.44 | 4.2E-02 |
| P15311 | Ezrin | 2.37 | 8.3E-04 |
| P25774 | Cathepsin S | 2.28 | 7.3E-04 |
| P31947 | 14-3-3 protein sigma | 2.23 | 9.2E-05 |
| O95994 | Anterior gradient protein 2 homolog | 2.22 | 4.2E-07 |
| P30740 | Leukocyte elastase inhibitor | 2.21 | 3.9E-09 |
| P08582 | Melanotransferrin | 2.21 | 6.1E-03 |
| Q9UM22 | Mammalian ependymin-related protein 1 | 2.16 | 1.8E-03 |
| Q8N307 | Mucin-20 | 2.16 | 2.8E-08 |
| P13796 | Plastin-2 | 2.14 | 1.4E-10 |
| P06702 | Protein S100-A9 | 2.13 | 5.4E-03 |
| P30530 | Tyrosine-protein kinase receptor UFO | 2.11 | 5.5E-08 |
| P35555 | Fibrillin-1 | 2.02 | 6.5E-03 |
| P16035 | Metalloproteinase inhibitor 2 | 1.99 | 6.8E-04 |
| P00750 | Tissue-type plasminogen activator | 1.97 | 2.5E-02 |
| Q96HE7 | ERO1-like protein alpha | 1.90 | 1.6E-10 |
| P00488 | Coagulation factor XIII A chain | 1.87 | 4.8E-04 |
| Q9UBR2 | Cathepsin Z | 1.85 | 2.7E-03 |
| O95631 | Netrin-1 | 1.83 | 1.7E-06 |
| P09917 | Polyunsaturated fatty acid 5-lipoxygenase | 1.78 | 2.4E-06 |
| Q13753 | Laminin subunit gamma-2 | 1.77 | 7.7E-09 |
| P62861 | Ubiquitin-like FUBI-ribosomal protein eS30 fusion protein | 1.77 | 4.2E-03 |
| Q13751 | Laminin subunit beta-3 | 1.76 | 8.5E-09 |
| P09382 | Galectin-1 | 1.75 | 3.0E-04 |
| P16144 | Integrin beta-4 | 1.73 | 2.1E-07 |
| Q6UWU2 | Beta-galactosidase-1-like protein | 1.71 | 1.2E-03 |
| P41218 | Myeloid cell nuclear differentiation antigen | 1.70 | 3.2E-05 |
| P32320 | Cytidine deaminase | 1.70 | 1.4E-03 |
| P17213 | Bactericidal permeability-increasing protein | 1.70 | 6.5E-03 |
| Q5JS37 | NHL repeat-containing protein 3 | 1.68 | 6.6E-04 |
| Q16651 | Prostasin | 1.66 | 2.7E-10 |
| Q01432 | AMP deaminase 3 | 1.65 | 3.7E-04 |
| Q9Y5Z4 | Heme-binding protein 2 | 1.65 | 2.9E-10 |
| P06396 | Gelsolin | 1.65 | 1.3E-05 |
| P08571 | Monocyte differentiation antigen CD14 | 1.64 | 1.6E-03 |
| P02751 | Fibronectin | 1.63 | 1.5E-03 |
| P55210 | Caspase-7 | 1.62 | 1.9E-03 |
| Q9BQE5 | Apolipoprotein L2 | 1.60 | 5.3E-03 |
| P55058 | Phospholipid transfer protein | 1.59 | 5.1E-07 |
| Q13442 | 28 kDa heat- and acid-stable phosphoprotein | 1.59 | 8.0E-03 |
| Q14764 | Major vault protein | 1.59 | 4.4E-07 |
| P16278 | Beta-galactosidase | 1.59 | 3.9E-03 |
| P35237 | Serpin B6 | 1.57 | 6.2E-04 |
| Q96MX0 | CKLF-like MARVEL transmembrane domain-containing protein 3 | 1.54 | 2.7E-02 |
| P18428 | Lipopolysaccharide-binding protein | 1.52 | 1.2E-04 |
| P11215 | Integrin alpha-M | 1.49 | 7.1E-06 |
| Q86UX7 | Fermitin family homolog 3 | 1.48 | 4.1E-04 |
| Q13510 | Acid ceramidase | 1.48 | 2.2E-03 |
| O94964 | Protein SOGA1 | 1.48 | 4.3E-06 |
| P06737 | Glycogen phosphorylase, liver form | 1.46 | 8.4E-07 |
| P08174 | Complement decay-accelerating factor | 1.43 | 2.4E-04 |
| P07355 | Annexin A2 | 1.43 | 6.3E-04 |
| Q9GZN4 | Brain-specific serine protease 4 | 1.41 | 2.7E-05 |
| P24071 | Immunoglobulin alpha Fc receptor | 1.41 | 3.5E-04 |
| Q13214 | Semaphorin-3B | 1.40 | 1.1E-02 |
| Q2PPJ7 | Ral GTPase-activating protein subunit alpha-2 | 1.40 | 1.2E-06 |
| Q9NXH8 | Torsin-4A | 1.40 | 4.7E-05 |
| Q92882 | Osteoclast-stimulating factor 1 | 1.38 | 5.5E-04 |
| P21741 | Midkine | 1.37 | 1.8E-03 |
| Q13443 | Disintegrin and metalloproteinase domain-containing protein 9 | 1.37 | 2.1E-05 |
| P15289 | Arylsulfatase A | 1.36 | 1.0E-04 |
| Q99536 | Synaptic vesicle membrane protein VAT-1 homolog | 1.36 | 4.2E-06 |
| P07339 | Cathepsin D | 1.36 | 8.6E-03 |
| Q8NHL6 | Leukocyte immunoglobulin-like receptor subfamily B member 1 | 1.34 | 2.6E-04 |
| P78386 | Keratin, type II cuticular Hb5 | 1.33 | 3.3E-03 |
| P12724 | Eosinophil cationic protein | 1.33 | 3.0E-03 |
| P17813 | Endoglin | 1.32 | 4.9E-03 |
| Q14116 | Interleukin-18 | 1.30 | 8.8E-07 |
| Q5GFL6 | von Willebrand factor A domain-containing protein 2 | 1.30 | 6.7E-04 |
| Q8N1N4 | Keratin, type II cytoskeletal 78 | 1.30 | 7.2E-06 |
| P12830 | Cadherin-1 | 1.29 | 2.5E-05 |
| P13987 | CD59 glycoprotein | 1.28 | 9.0E-05 |
| Q9BRF8 | Serine/threonine-protein phosphatase CPPED1 | 1.26 | 5.4E-03 |
| Q8N423 | Leukocyte immunoglobulin-like receptor subfamily B member 2 | 1.25 | 1.3E-03 |
| P50395 | Rab GDP dissociation inhibitor beta | 1.24 | 1.7E-07 |
| P63261 | Actin, cytoplasmic 2 | 1.23 | 2.4E-04 |
| Q9UJU6 | Drebrin-like protein | 1.22 | 5.1E-04 |
| P35030 | Trypsin-3 | 1.21 | 5.7E-03 |
| P16284 | Platelet endothelial cell adhesion molecule | 1.21 | 1.4E-03 |
| Q13444 | Disintegrin and metalloproteinase domain-containing protein 15 | 1.20 | 8.3E-05 |
| Q9H4A4 | Aminopeptidase B | 1.20 | 4.1E-06 |
| P31025 | Lipocalin-1 | 1.20 | 1.3E-02 |
| P09104 | Gamma-enolase | 1.20 | 7.5E-06 |
| P62937 | Peptidyl-prolyl cis-trans isomerase A | 1.19 | 1.0E-03 |
| Q8TD55 | Pleckstrin homology domain-containing family O member 2 | 1.18 | 5.8E-04 |
| O00391 | Sulfhydryl oxidase 1 | 1.18 | 2.2E-07 |
| Q10472 | Polypeptide N-acetylgalactosaminyltransferase 1 | 1.17 | 4.6E-05 |
| Q9Y376 | Calcium-binding protein 39 | 1.16 | 6.6E-03 |
| O43240 | Kallikrein-10 | 1.16 | 7.5E-05 |
| O00622 | CCN family member 1 | 1.14 | 3.3E-04 |
| Q9NRV9 | Heme-binding protein 1 | 1.14 | 2.1E-06 |
| O00602 | Ficolin-1 | 1.14 | 8.9E-06 |
| P05156 | Complement factor I | 1.13 | 9.9E-03 |
| P05204 | Non-histone chromosomal protein HMG-17 | 1.13 | 9.6E-03 |
| Q9H5V8 | CUB domain-containing protein 1 | 1.12 | 1.8E-04 |
| P29323 | Ephrin type-B receptor 2 | 1.12 | 2.6E-03 |
| O43278 | Kunitz-type protease inhibitor 1 | 1.11 | 3.0E-04 |
| P80188 | Neutrophil gelatinase-associated lipocalin | 1.11 | 6.5E-05 |
| P17900 | Ganglioside GM2 activator | 1.11 | 1.3E-09 |
| P09960 | Leukotriene A-4 hydrolase | 1.09 | 3.2E-05 |
| O15455 | Toll-like receptor 3 | 1.09 | 7.3E-03 |
| P20933 | N(4)-(beta-N-acetylglucosaminyl)-L-asparaginase | 1.09 | 4.6E-03 |
| P17931 | Galectin-3 | 1.08 | 1.2E-05 |
| P08581 | Hepatocyte growth factor receptor | 1.07 | 1.5E-04 |
| Q14766 | Latent-transforming growth factor beta-binding protein 1 | 1.04 | 4.1E-04 |
| P34059 | N-acetylgalactosamine-6-sulfatase | 1.03 | 6.6E-05 |
| O00299 | Chloride intracellular channel protein 1 | 1.03 | 7.5E-04 |
| O14727 | Apoptotic protease-activating factor 1 | 1.02 | 9.9E-06 |
| Q15063 | Periostin | 1.01 | 7.1E-06 |
| P50453 | Serpin B9 | 1.01 | 1.5E-08 |
| Q96FZ5 | CKLF-like MARVEL transmembrane domain-containing protein 7 | 1.00 | 3.1E-07 |
| P50452 | Serpin B8 | 1.00 | 8.6E-04 |
| P46531 | Neurogenic locus notch homolog protein 1 | 1.00 | 2.4E-03 |
| P10809 | 60 kDa heat shock protein, mitochondrial | -1.00 | 3.1E-08 |
| Q9H2P0 | Activity-dependent neuroprotector homeobox protein | -1.01 | 2.8E-07 |
| Q9H0U6 | Large ribosomal subunit protein uL18m | -1.04 | 3.4E-02 |
| P55268 | Laminin subunit beta-2 | -1.04 | 3.2E-04 |
| P02753 | Retinol-binding protein 4 | -1.06 | 2.2E-02 |
| O00264 | Membrane-associated progesterone receptor component 1 | -1.12 | 8.2E-06 |
| P43121 | Cell surface glycoprotein MUC18 | -1.13 | 2.2E-02 |
| P00738 | Haptoglobin | -1.17 | 1.3E-03 |
| Q9UNW1 | Multiple inositol polyphosphate phosphatase 1 | -1.17 | 1.3E-03 |
| P02679 | Fibrinogen gamma chain | -1.20 | 2.0E-04 |
| O00592 | Podocalyxin | -1.22 | 1.1E-03 |
| P13995 | Bifunctional methylenetetrahydrofolate dehydrogenase/cyclohydrolase, mitochondrial | -1.22 | 2.1E-03 |
| P18065 | Insulin-like growth factor-binding protein 2 | -1.22 | 3.2E-04 |
| P01871 | Immunoglobulin heavy constant mu | -1.28 | 1.1E-03 |
| Q9HCB6 | Spondin-1 | -1.30 | 8.9E-05 |
| Q9H1B7 | Probable E3 ubiquitin-protein ligase IRF2BPL | -1.37 | 1.9E-04 |
| Q9BY44 | Eukaryotic translation initiation factor 2A | -1.38 | 4.3E-05 |
| P02766 | Transthyretin | -1.43 | 1.8E-04 |
| P15907 | Beta-galactoside alpha-2,6-sialyltransferase 1 | -1.43 | 1.9E-04 |
| Q9UHI8 | A disintegrin and metalloproteinase with thrombospondin motifs 1 | -1.45 | 8.6E-07 |
| P01024 | Complement C3 | -1.48 | 5.0E-05 |
| P20160 | Azurocidin | -1.52 | 4.0E-04 |
| O75718 | Cartilage-associated protein | -1.55 | 1.2E-05 |
| P01911 | HLA class II histocompatibility antigen, DRB1 beta chain | -1.56 | 6.0E-04 |
| Q92563 | Testican-2 | -1.56 | 6.8E-04 |
| O15230 | Laminin subunit alpha-5 | -1.61 | 1.2E-04 |
| P09486 | SPARC | -1.63 | 8.0E-04 |
| P04196 | Histidine-rich glycoprotein | -1.64 | 4.6E-03 |
| P10909 | Clusterin | -1.66 | 1.7E-05 |
| Q03169 | Tumor necrosis factor alpha-induced protein 2 | -1.70 | 9.0E-06 |
| P19652 | Alpha-1-acid glycoprotein 2 | -1.71 | 9.3E-04 |
| P02790 | Hemopexin | -1.72 | 1.7E-04 |
| P05161 | Ubiquitin-like protein ISG15 | -1.72 | 2.9E-07 |
| Q13228 | Methanethiol oxidase | -1.79 | 1.1E-06 |
| P02787 | Serotransferrin | -1.79 | 4.3E-05 |
| P02786 | Transferrin receptor protein 1 | -1.81 | 1.2E-05 |
| P00450 | Ceruloplasmin | -1.82 | 7.7E-07 |
| Q96SL4 | Glutathione peroxidase 7 | -1.83 | 1.7E-03 |
| P02763 | Alpha-1-acid glycoprotein 1 | -1.85 | 1.1E-04 |
| P30511 | HLA class I histocompatibility antigen, alpha chain F | -1.90 | 3.5E-02 |
| P01857 | Immunoglobulin heavy constant gamma 1 | -1.92 | 8.4E-05 |
| P50454 | Serpin H1 | -1.96 | 1.4E-05 |
| Q92626 | Peroxidasin homolog | -2.11 | 2.7E-06 |
| P01011 | Alpha-1-antichymotrypsin | -2.15 | 6.6E-05 |
| P49746 | Thrombospondin-3 | -2.26 | 3.6E-07 |
| P01009 | Alpha-1-antitrypsin | -2.29 | 2.1E-05 |
| P01780 | Immunoglobulin heavy variable 3-7 | -2.30 | 3.8E-04 |
| P01834 | Immunoglobulin kappa constant | -2.41 | 4.9E-06 |
| A0A075B6H7 | Probable non-functional immunoglobulin kappa variable 3-7 | -3.62 | 7.8E-06 |
| P01619 | Immunoglobulin kappa variable 3-20 | -3.64 | 9.5E-06 |

**Supplementary Table S2: The significance of all identified keratins on the progression-free survival (PFS) and overall survival (OS) of stage III and IV high-grade (grade III) serous ovarian cancers.** The average log 2 abundance ratios were shaded green when greater than 1, while the p-values of PFS and OS according to the log-rank test reported by the KM plotting tool32 were shaded green less than 0.05.

| **Protein name** | **UniProt ID** | **Average log 2 abundance ratio (resistant/sensitive native ADS)** | **Log-ranked values from KM Plotter** | |
| --- | --- | --- | --- | --- |
| **PFS** | **OS** |
| KRT17 | Q04695 | 3.39 | 0.38 | 0.44 |
| KRT8 | P05787 | 2.54 | 0.054 | 0.38 |
| KRT18 | P05783 | 2.27 | 0.08 | 0.43 |
| KRT19 | P08727 | 2.09 | 0.057 | 0.17 |
| KRT7 | P08729 | 1.95 | .0028 | 0.064 |
| KRT13 | P13646 | 1.87 | 0.00042 | 0.065 |
| KRT5 | P13647 | 1.83 | 0.022 | 0.16 |
| KRT32 | Q14532 | 1.82 | 0.15 | 0.22 |
| KRT80 | Q6KB66 | 1.78 | 0.013 | 0.26 |
| KRT16 | P08779 | 1.70 | 0.022 | 0.05 |
| KRT6C | P48668 | 1.65 | 0.0094 | 0.044 |
| KRT76 | Q01546 | 1.39 | 0.065 | 0.12 |
| KRT14 | P02533 | 1.38 | 0.027 | 0.0092 |
| KRT85 | P78386 | 1.33 | 0.0037 | 0.037 |
| KRT78 | Q8N1N4 | 1.30 | 0.099 | 0.3 |
| KRT23 | Q9C075 | 1.25 | 0.16 | 0.01 |
| KRT15 | P19012 | 0.96 | 0.0038 | 0.028 |
| KRT72 | Q14CN4 | 0.93 | 0.015 | 0.012 |
| KRT84 | Q9NSB2 | 0.88 | 0.0029 | 0.1 |
| KRT4 | P19013 | 0.85 | 0.045 | 0.17 |
| KRT6A | P02538 | 0.57 | 0.0094 | 0.044 |
| KRT9 | P35527 | 0.39 | 8.1e-05 | 0.065 |
| KRT6B | P04259 | 0.23 | 0.036 | 0.12 |
| KRT1 | P04264 | 0.20 | 0.081 | 0.38 |
| KRT10 | P13645 | 0.07 | 0.39 | 0.085 |
| KRT2 | P35908 | 0.05 | 0.0092 | 0.053 |
| KRT74 | Q7RTS7 | -0.09 | 0.03 | 0.082 |
| KRT77 | Q7Z794 | -0.28 | 0.0075 | 0.096 |

**Supplementary Table S3: Clinicopathological details of patients from which tumour material was collected in this study.**

| **Patient ID** | **Age at diagnosis** | **Diagnosis** | **Stage** | **Grade** | **Clinical chemoresponse** |
| --- | --- | --- | --- | --- | --- |
| 1 | 66 | Serous carcinoma of the peritoneum | 4 | 3 | Sensitive |
| 2 | 50 | Serous carcinoma of the peritoneum | 3c | 3 | Sensitive |
| 3 | 75 | Recurrent serous carcinoma of the ovary | 4 | 3 | Resistant |
| 4 | 47 | Recurrent serous carcinoma of the ovary | 1c | 3 | Resistant |
| 5 | 73 | Serous carcinoma of the peritoneum | 4 | 3 | Unknown |
| 6 | 71 | Recurrent chemotherapy-resistant serous carcinoma of the ovary | - | - | Resistant |
